# Supplementary material for: Ultrathin g-C3N4 nanosheets with hexagonal CuS nanoplates as a novel composite photocatalyst under solar light irradiation for H2 production
Source: Royal Society of Chemistry journal article supplement (doi:10.1039/c7cy00110j), 2017-01-01
Supplement: c7cy00110j1.pdf [file c7cy00110j1.pdf]

## Supporting Information

# A novel ultrathin g-C<sub>3</sub>N<sub>4</sub> nanosheet with hexagonal CuS nanoplates composite under solar light irradiation for H<sub>2</sub> production

Shuyan Yu<sup>1,2</sup>, Richard D. Webster<sup>2,3</sup>, Yan Zhou<sup>1,2\*</sup>, Xiaoli Yan<sup>1,4\*</sup>

1. School of Civil and Environmental Engineering, Nanyang Technological

University, 50 Nanyang Avenue, Singapore 639798, Republic of Singapore

2. Nanyang Environment and Water Research Institute (NEWRI), Nanyang

Technological University, 1 Cleantech Loop, CleanTech One, Singapore 637141,

Republic of Singapore

3. School of Physical and Mathematical Sciences, Nanyang Technological

University, 21 Nanyang Link, Singapore 637371, Republic of Singapore

4. Environmental and Water Technology Centre of Innovation, Ngee Ann Polytechnic,  
535 Clementi Road, Singapore 599489 (Current address)

\*Corresponding authors: Dr. Yan Zhou [zhouyan@ntu.edu.sg](mailto:zhouyan@ntu.edu.sg); Dr. Xiaoli Yan

[xlyan@ntu.edu.sg](mailto:xlyan@ntu.edu.sg)

## Supporting Information

2 pages

1 figures

## S1 The colour change of the obtained products

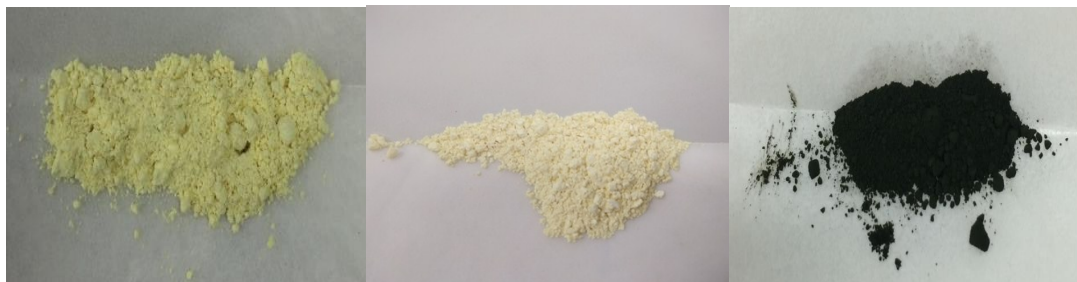

**Fig S1.** Graphitic bulk g-C<sub>3</sub>N<sub>4</sub> (pale-yellow powder), Ultrathin g-C<sub>3</sub>N<sub>4</sub> nanosheet (pale powder) and g-C<sub>3</sub>N<sub>4</sub>-CuS (black powder)

The g-C<sub>3</sub>N<sub>4</sub> nanosheets with distinguishable ultrathin layers after the photocatalysis reaction and 30 days storage were observed by TEM (Fig. S2). It shows the less aggregation of g-C<sub>3</sub>N<sub>4</sub> nanosheets, indicating the excellent stability.

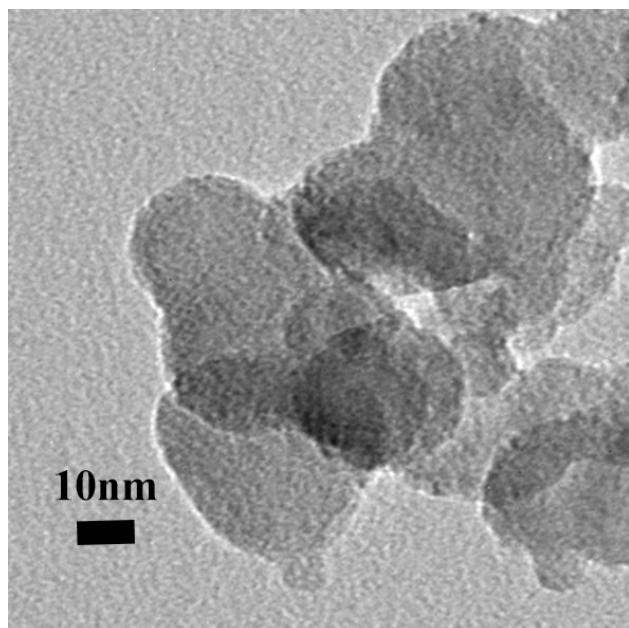

**Fig S2.** TEM image of g-C<sub>3</sub>N<sub>4</sub> nanosheets after photocatalysis reaction and 30 days storage
